# Supplementary figures and images for: Investigating the trade-off between folding and function in a multidomain Y-family DNA polymerase
Source: eLife journal article supplement (doi:10.7554/elife.60434), 2020-10-20

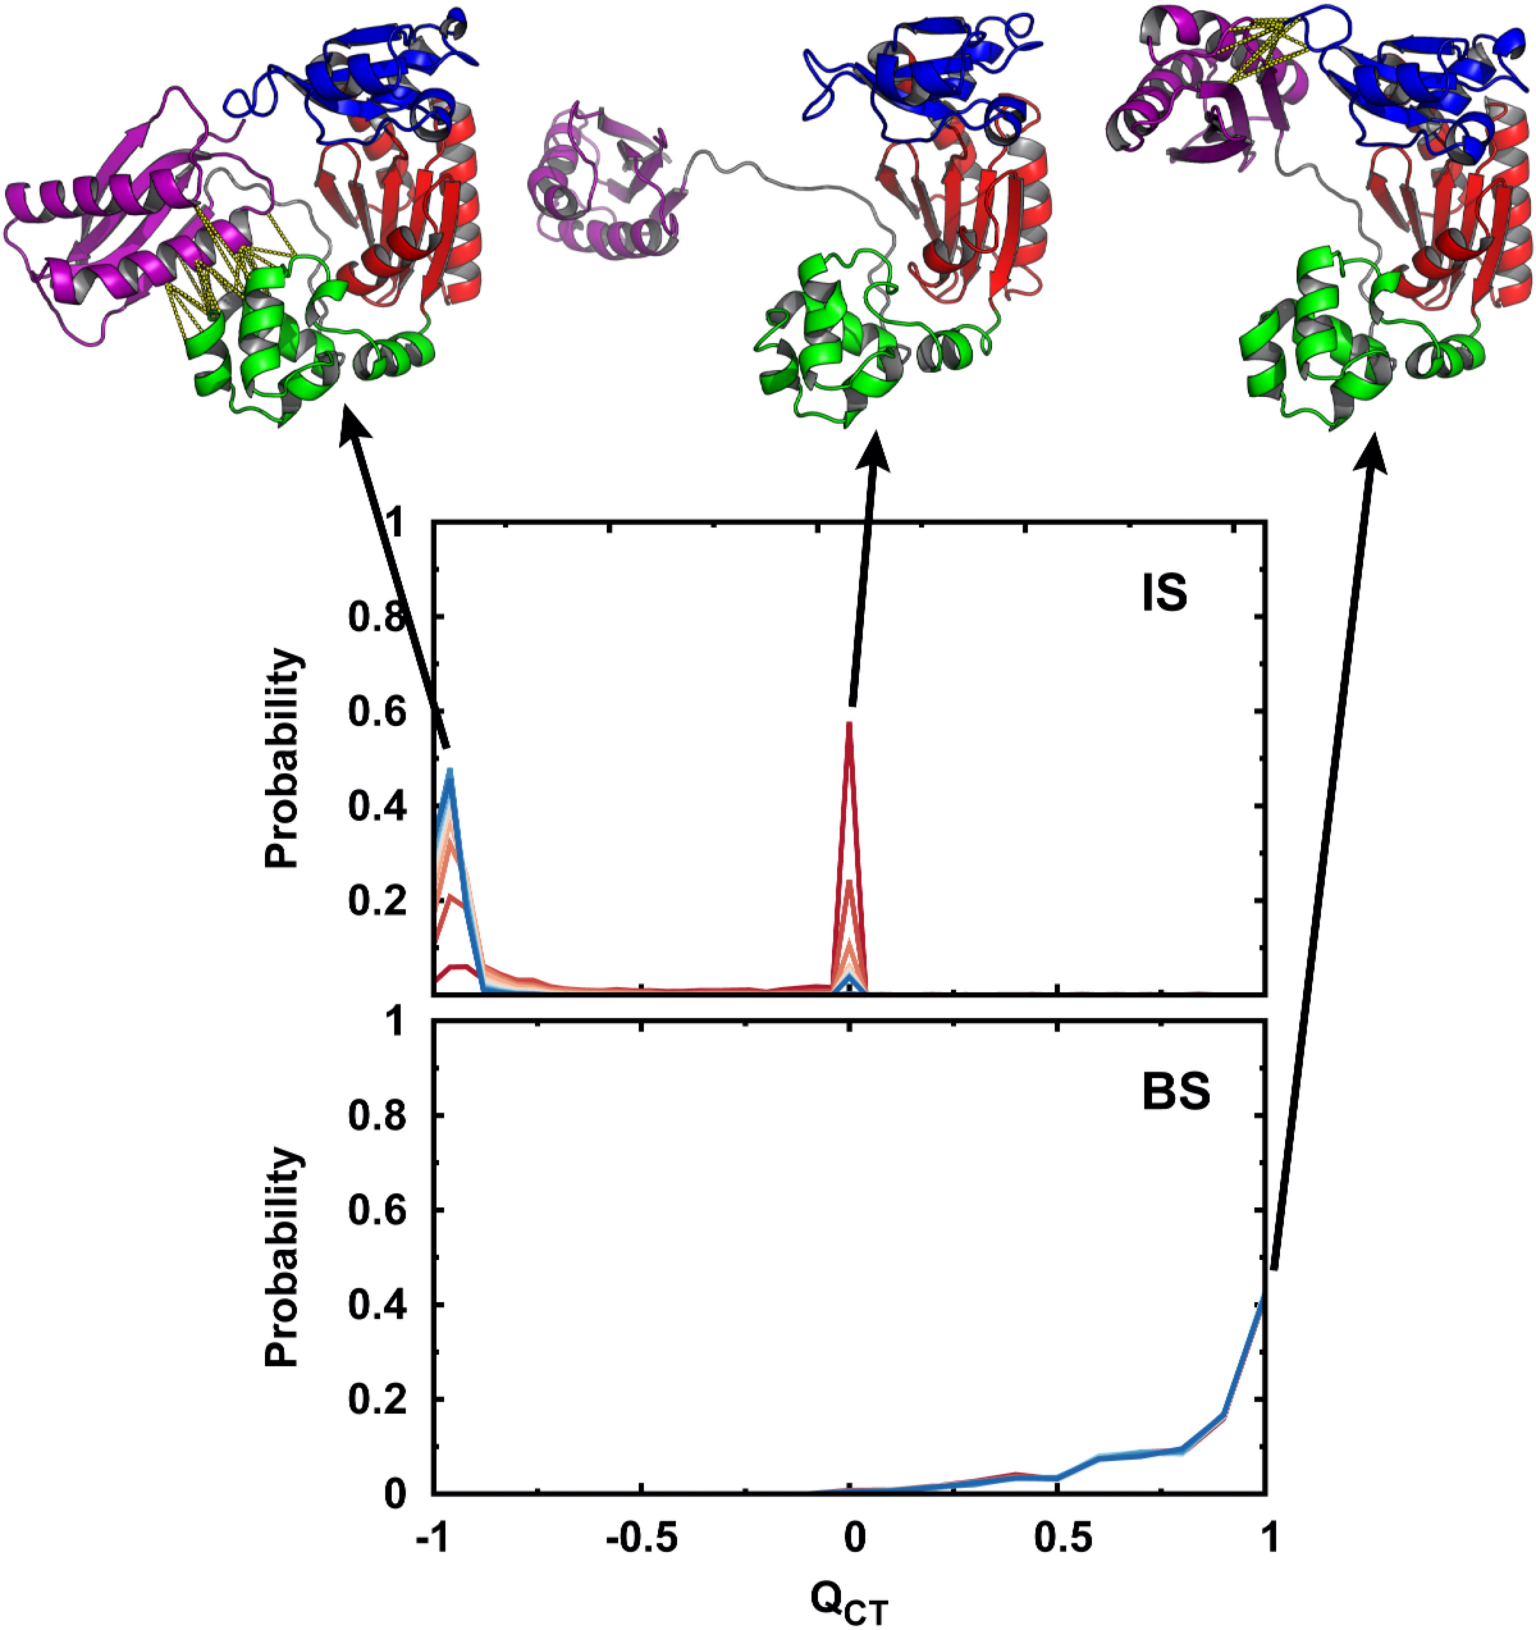

Supplement: supp [file elife-60434-supp-v1.zip]

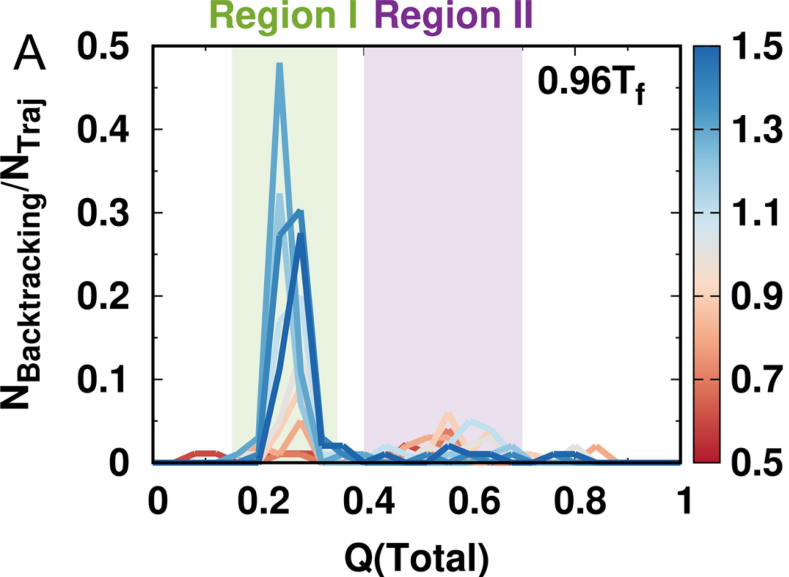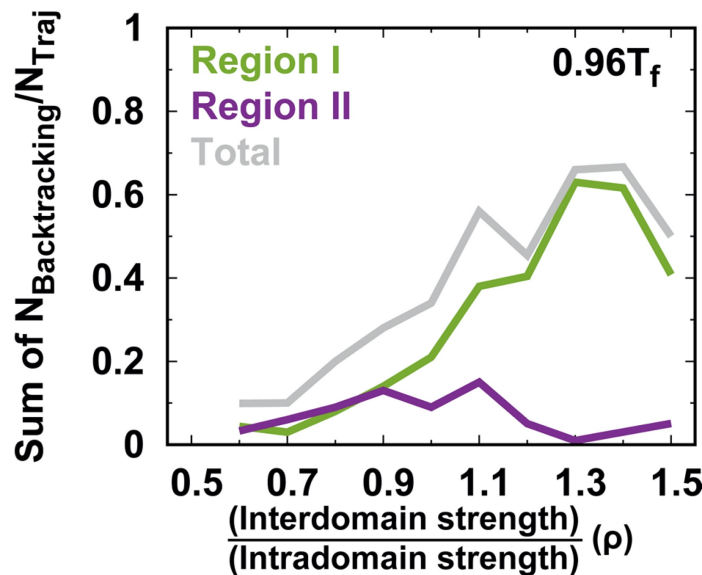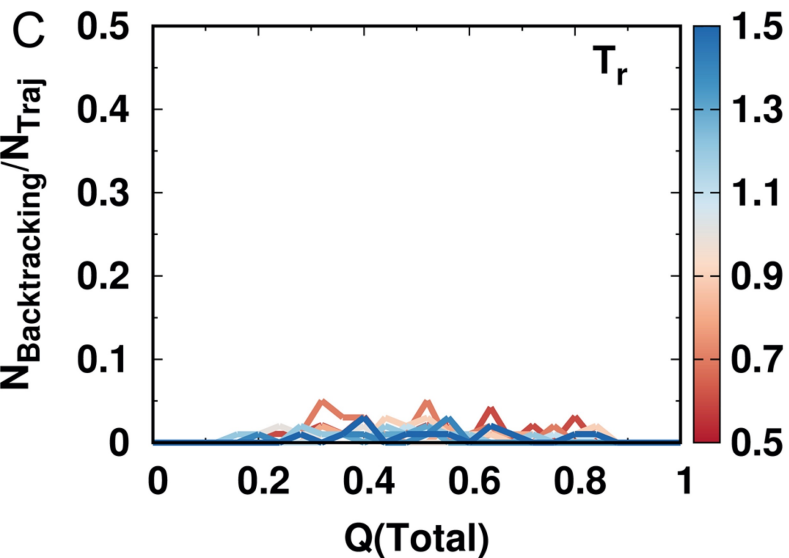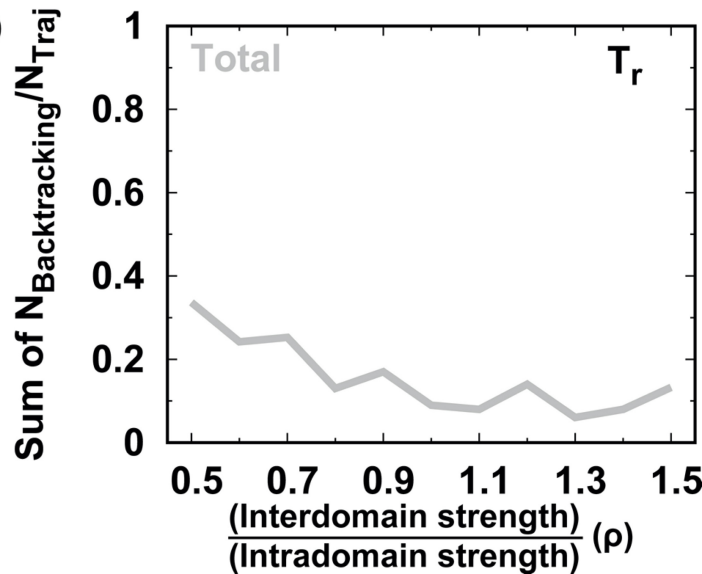

Supplement: supp [file elife-60434-supp-v1.zip]

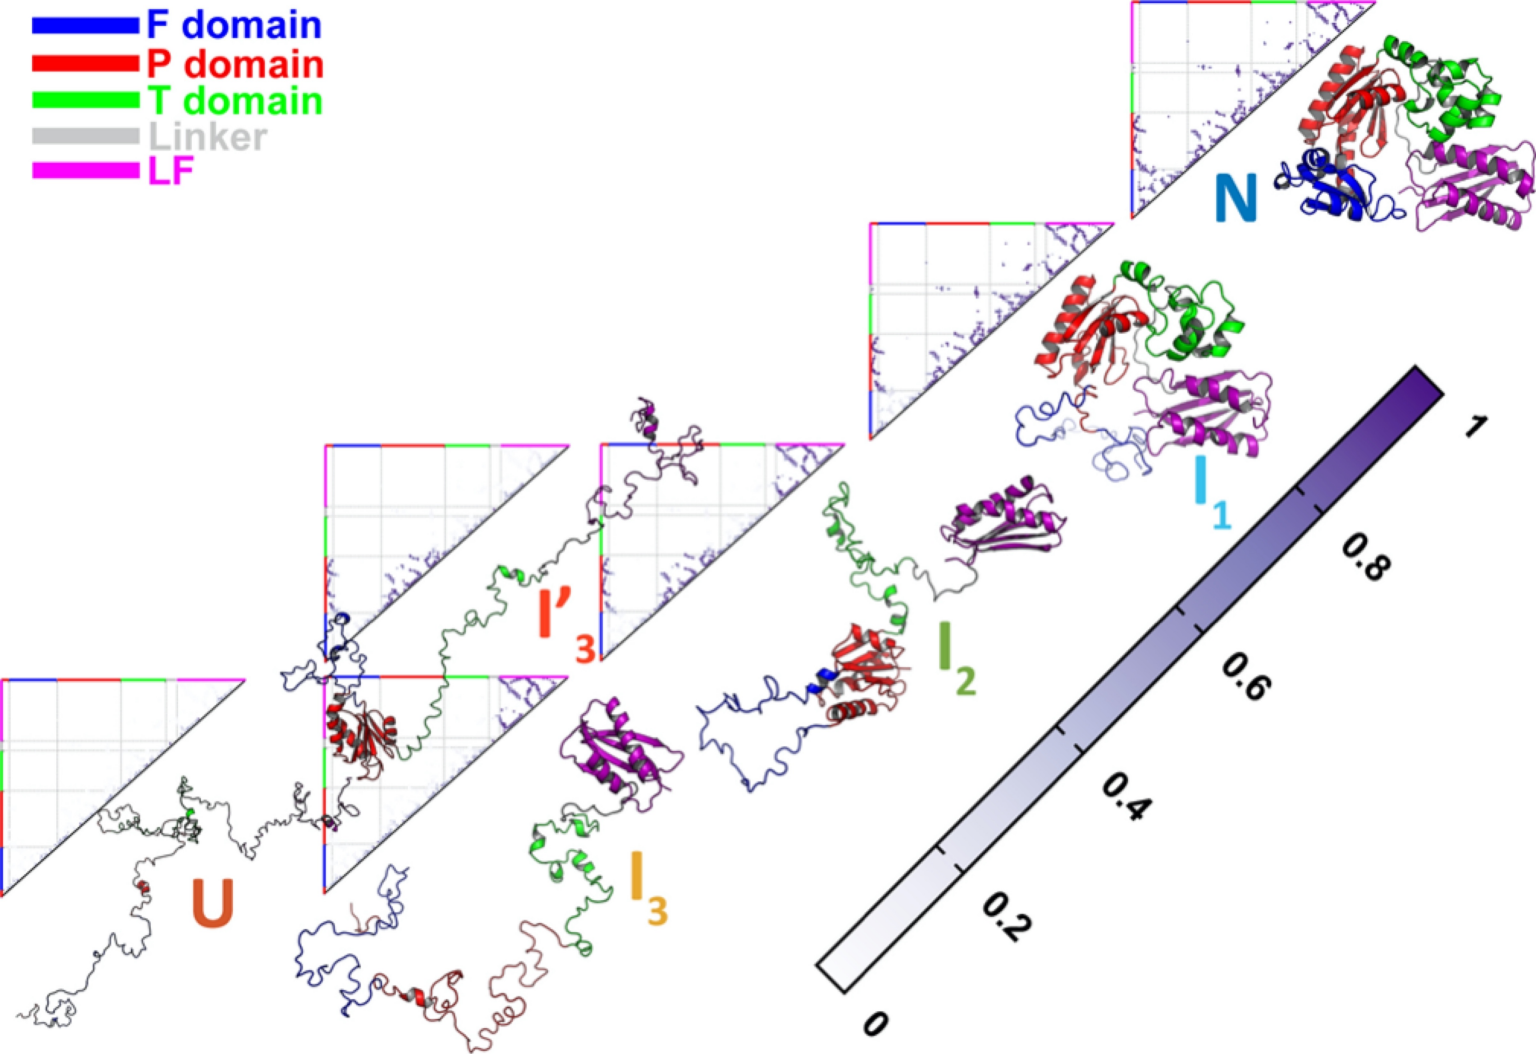

Supplement: supp [file elife-60434-supp-v1.zip]

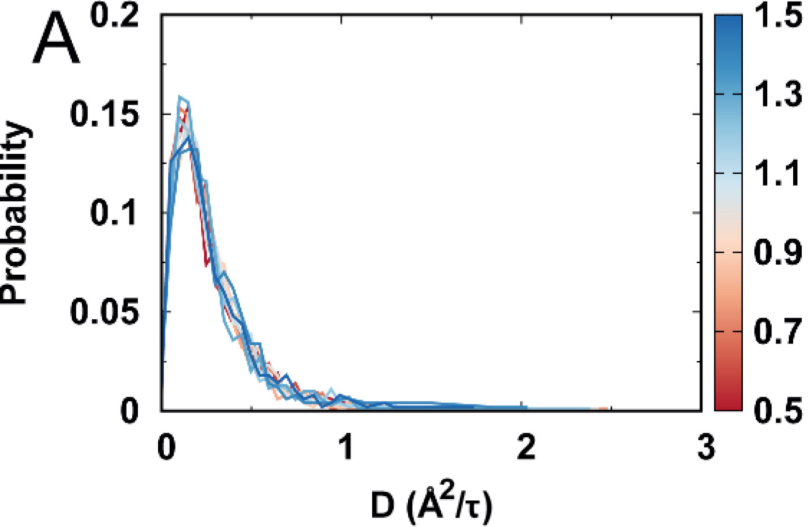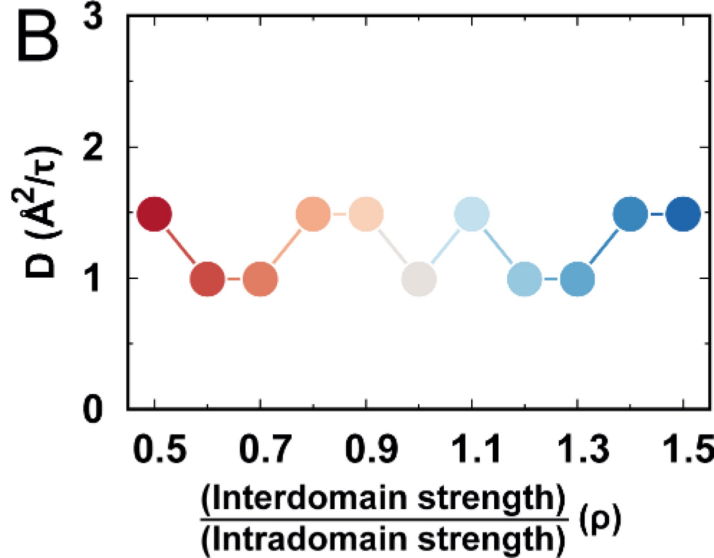

Supplement: supp [file elife-60434-supp-v1.zip]

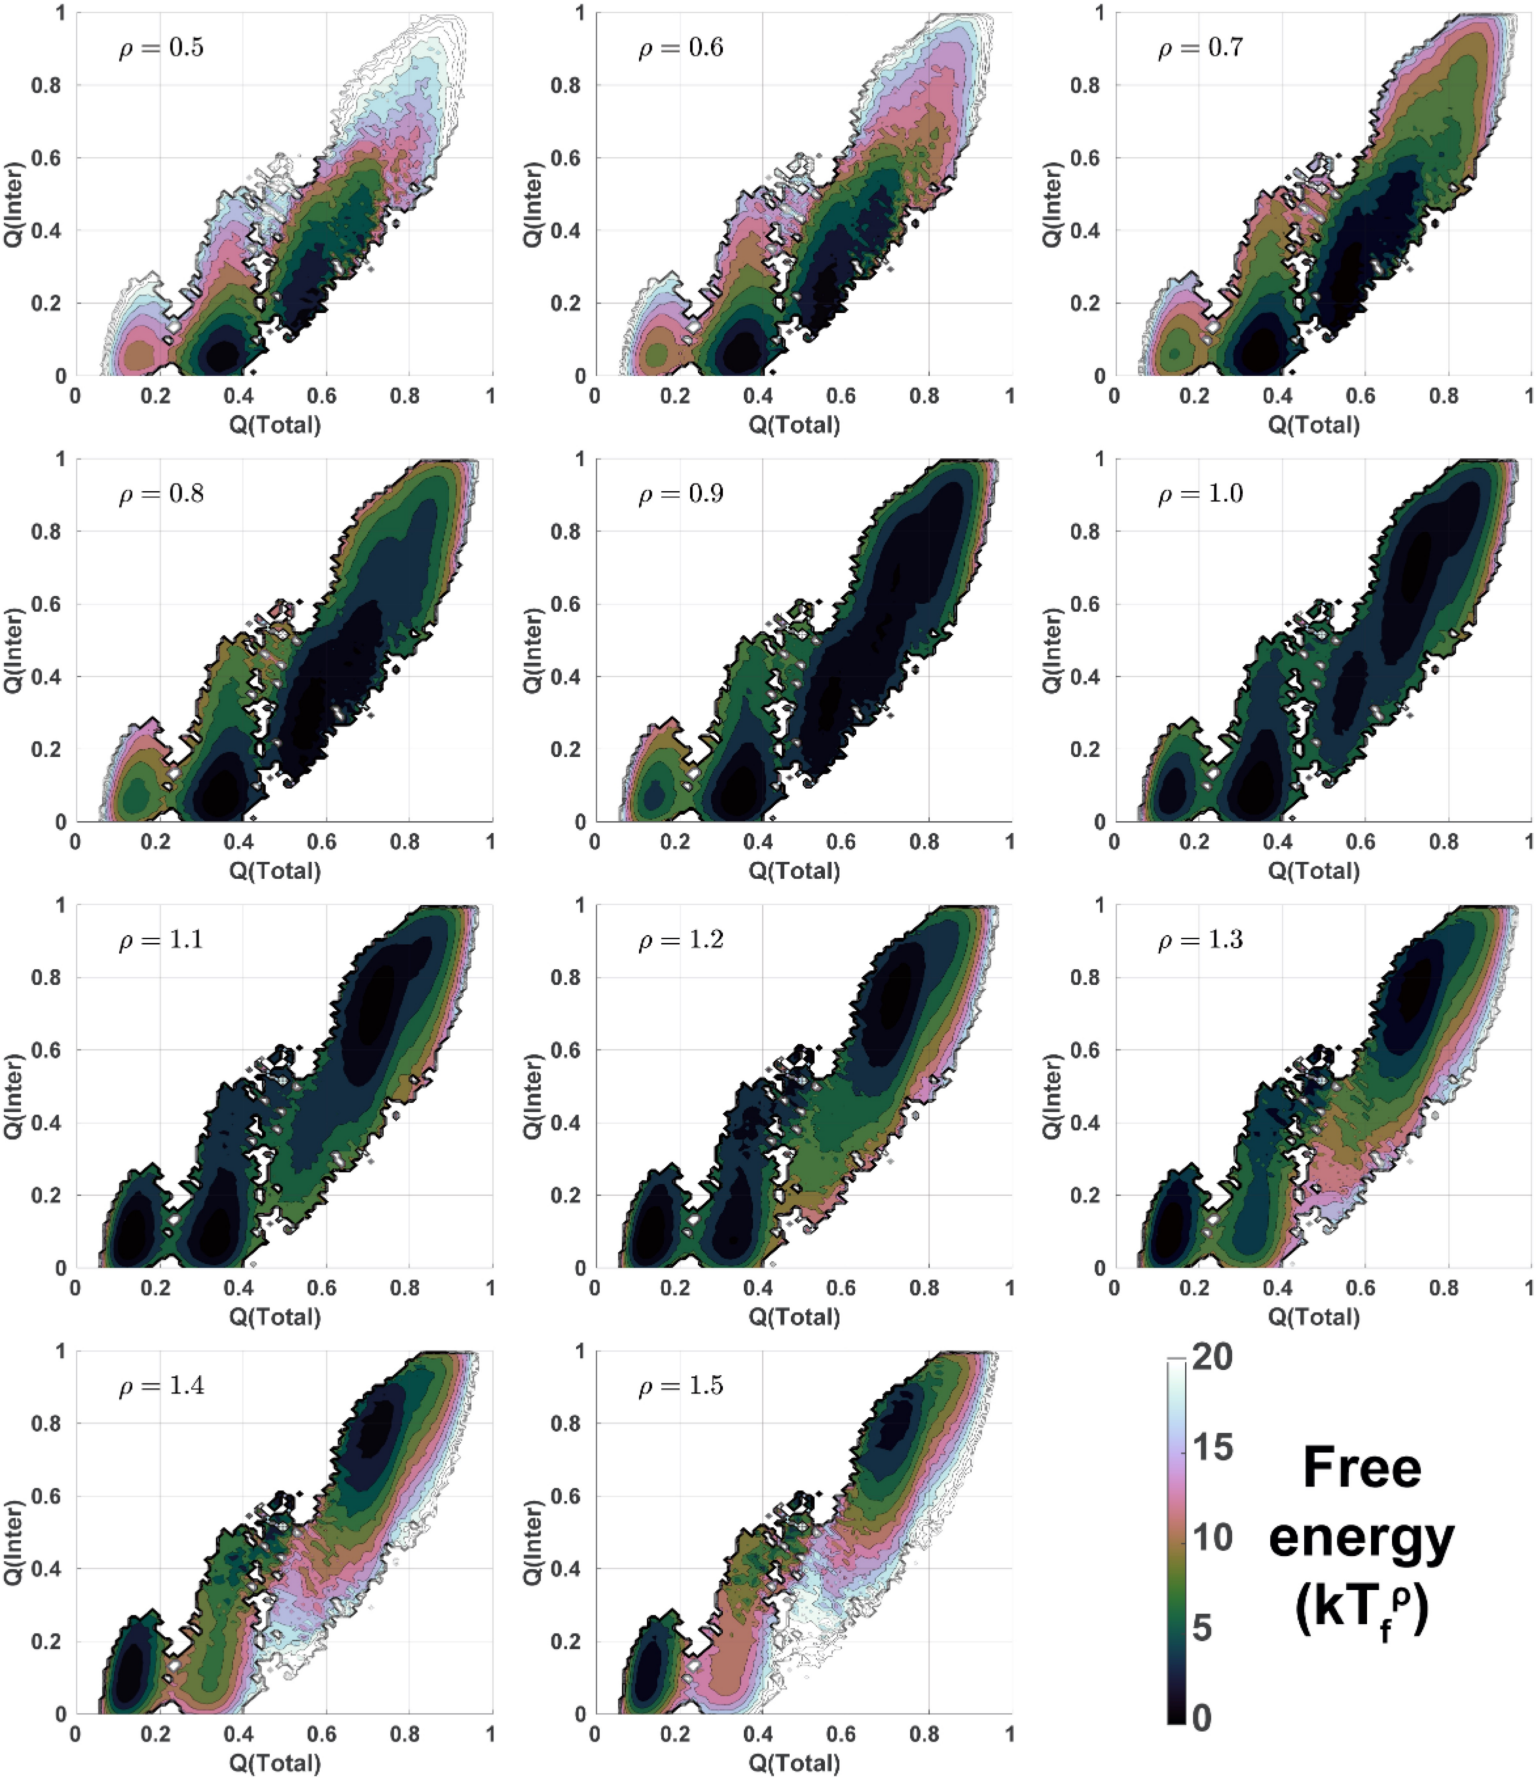

Supplement: supp [file elife-60434-supp-v1.zip]

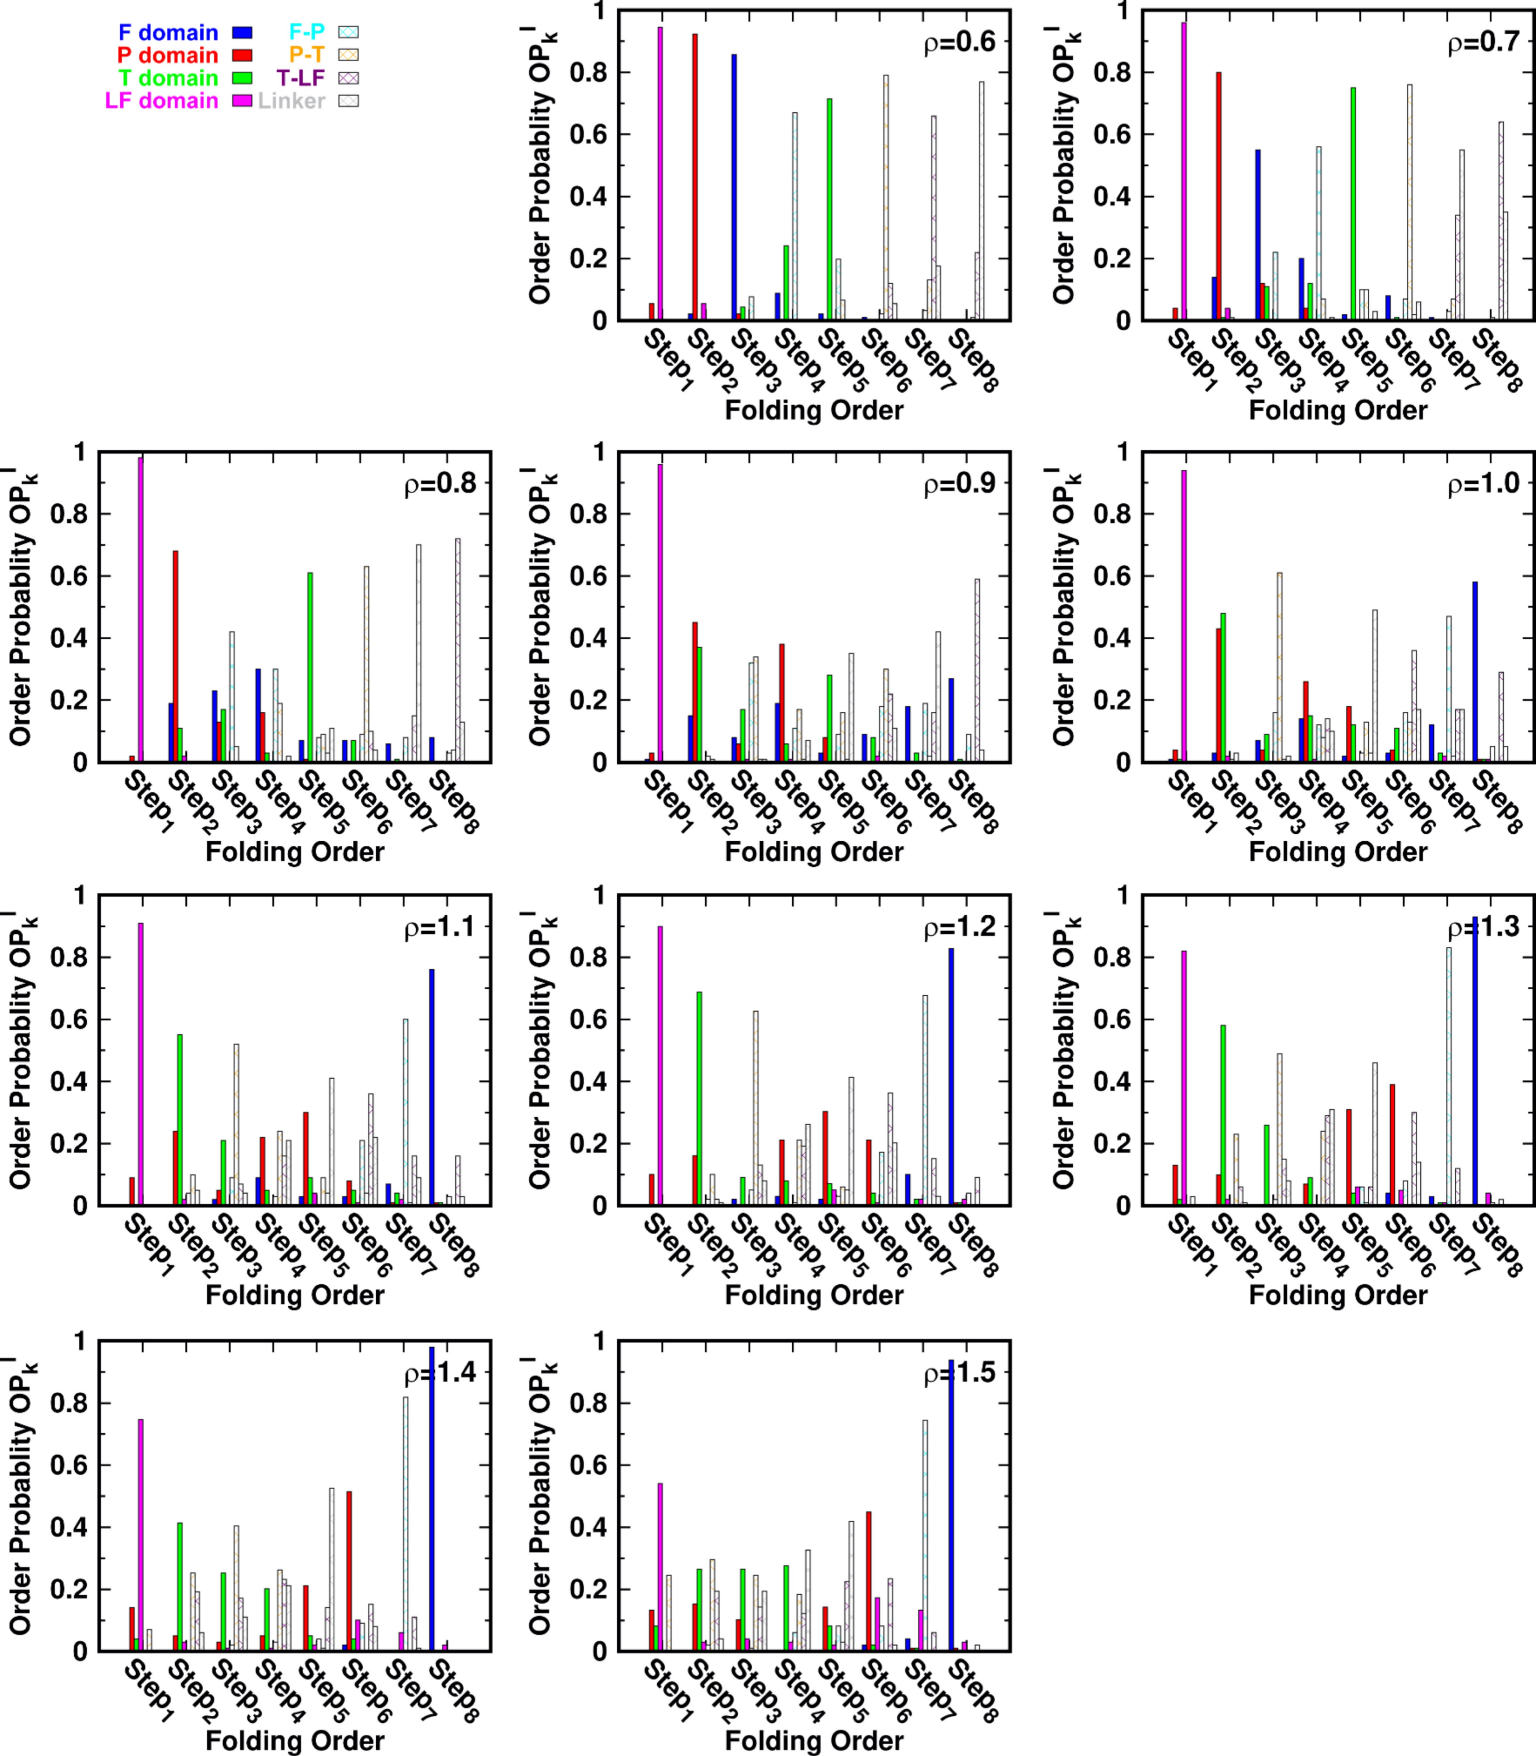

Supplement: supp [file elife-60434-supp-v1.zip]

$0.96T_f$

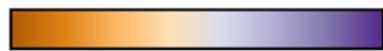

Trajectory Number

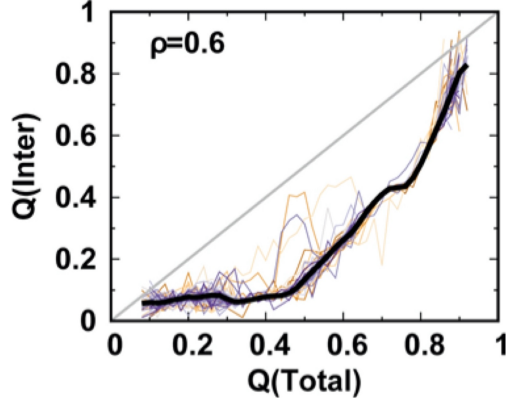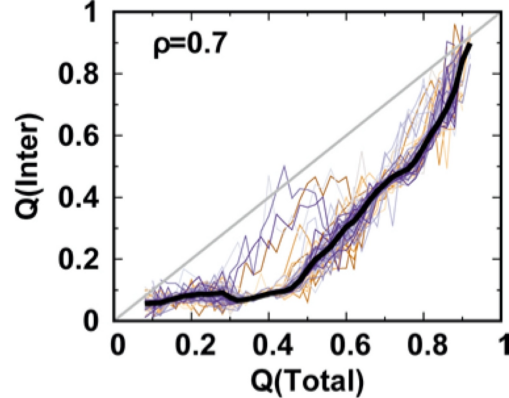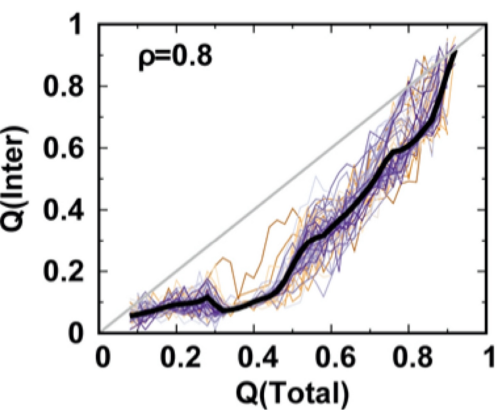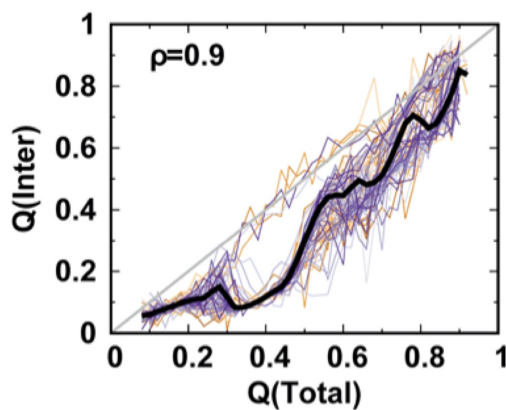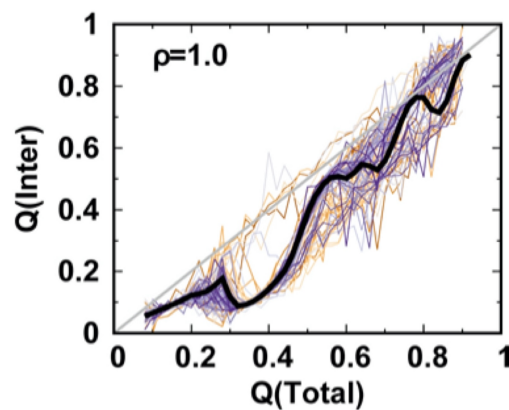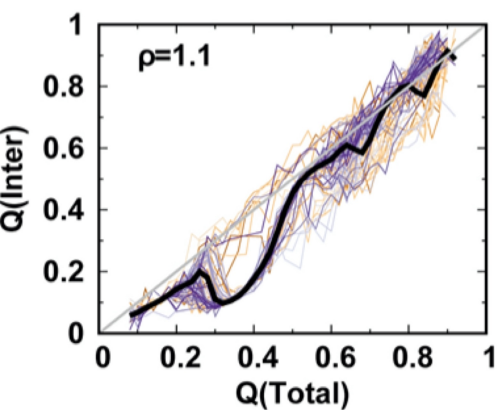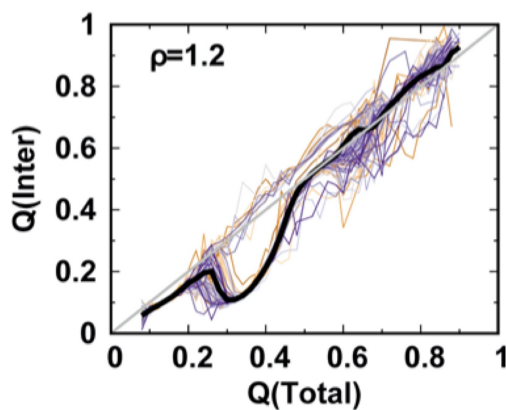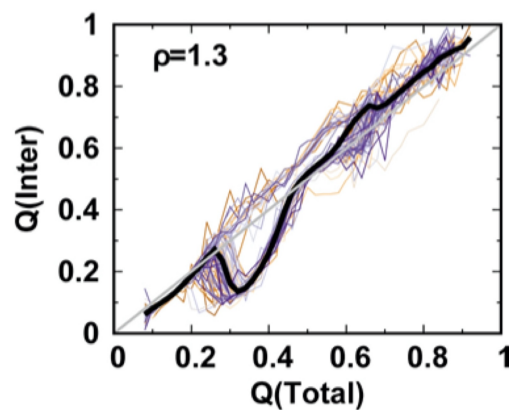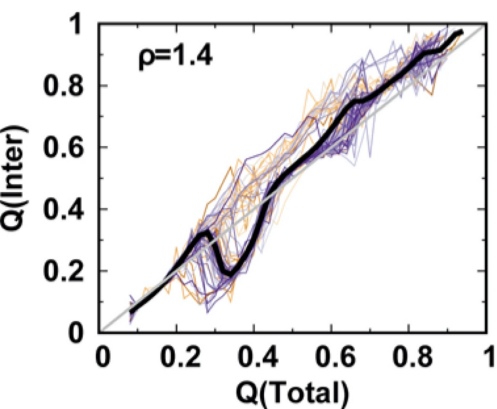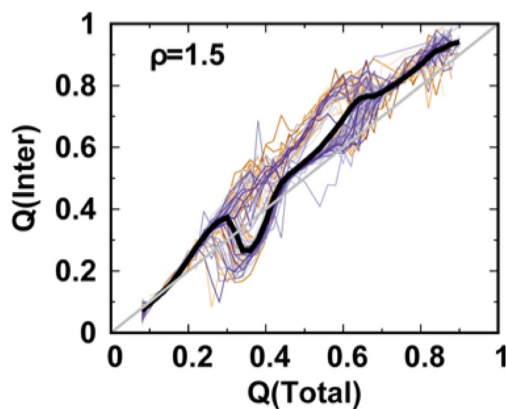

Supplement: supp [file elife-60434-supp-v1.zip]

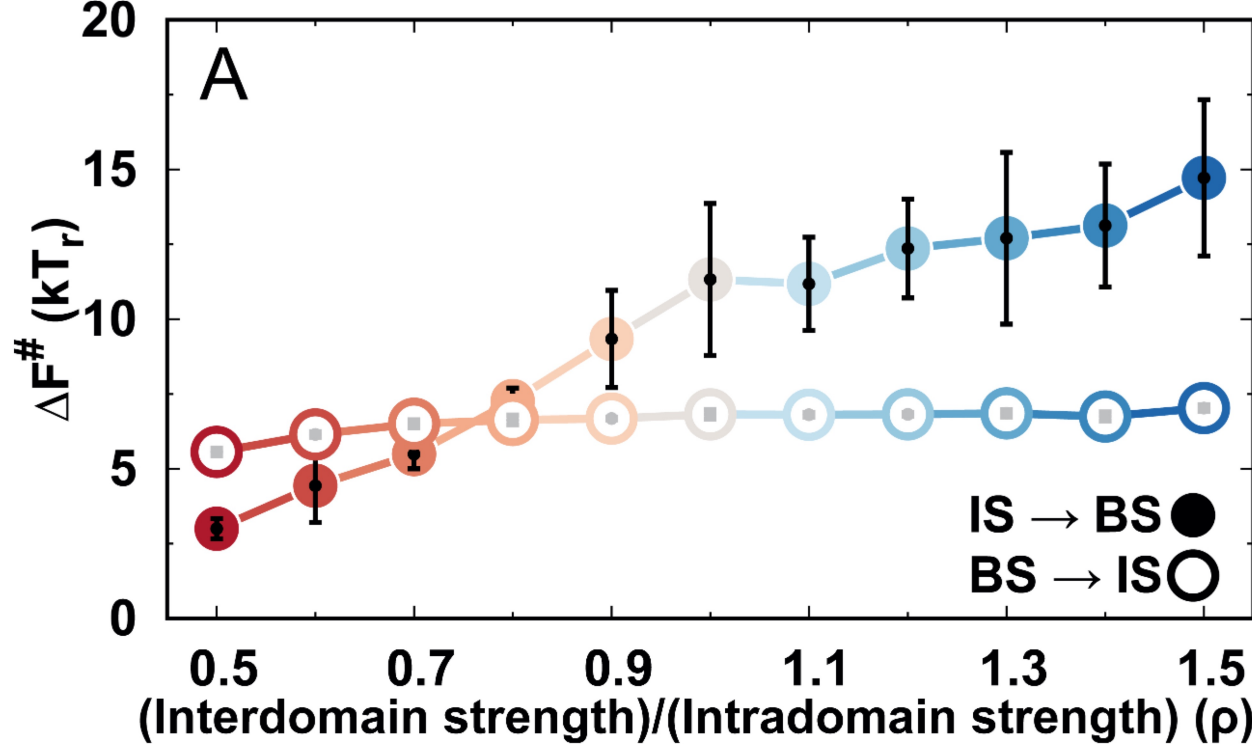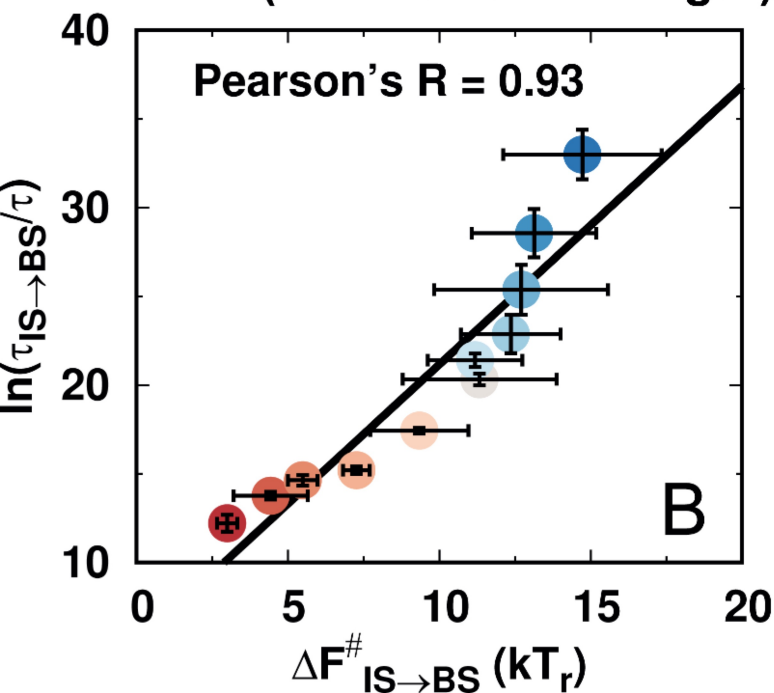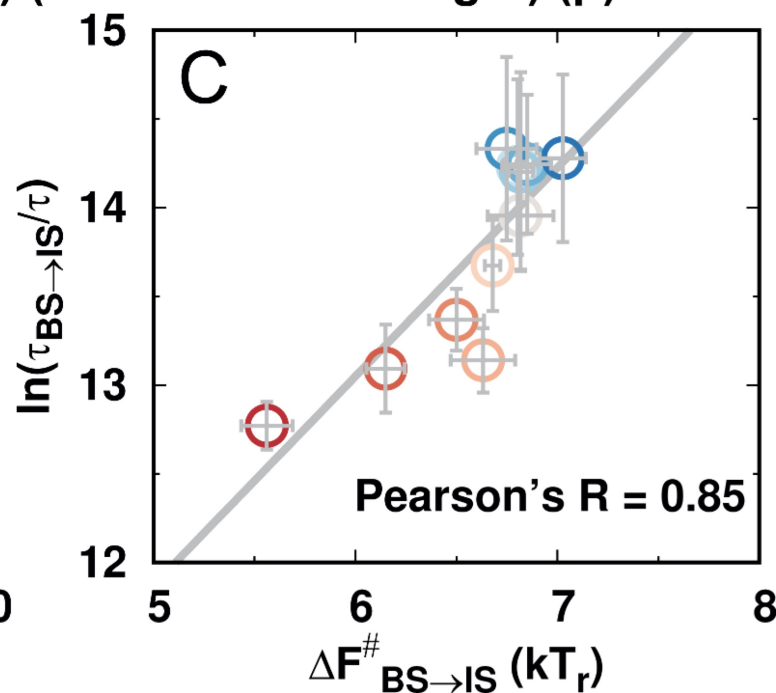

Supplement: supp [file elife-60434-supp-v1.zip]

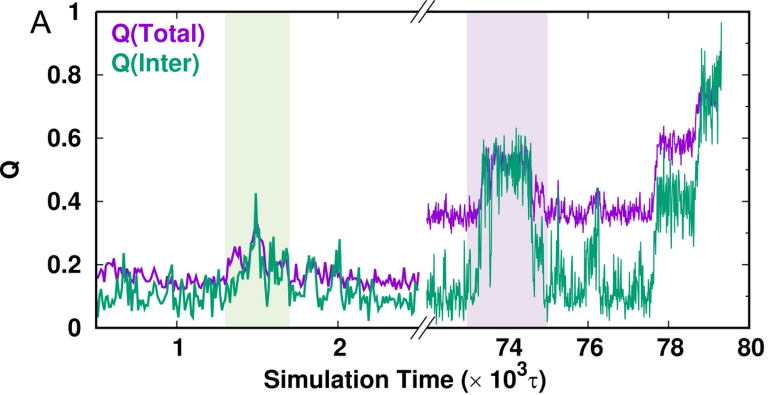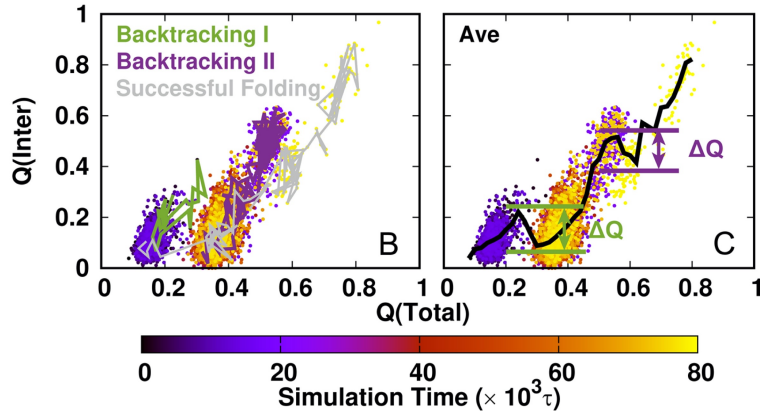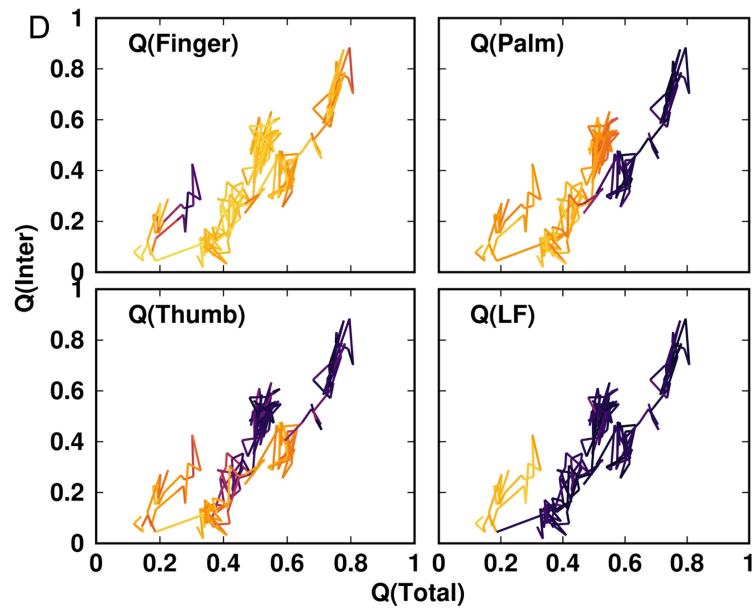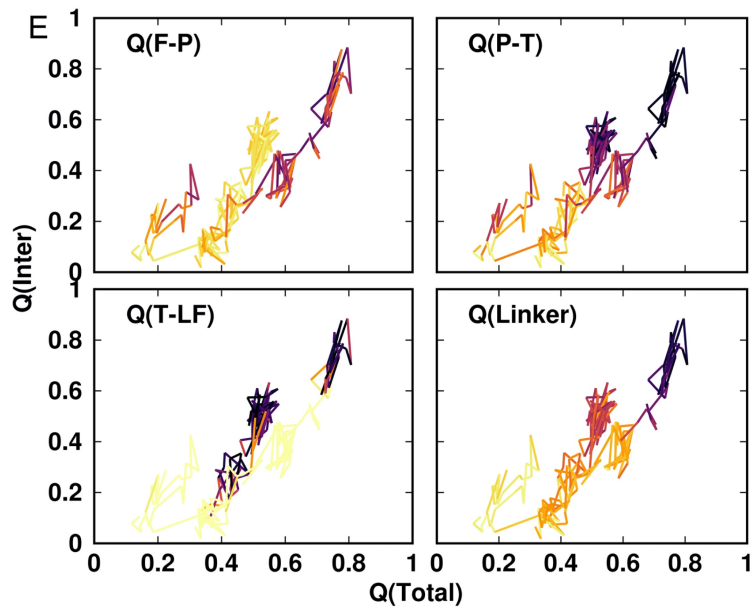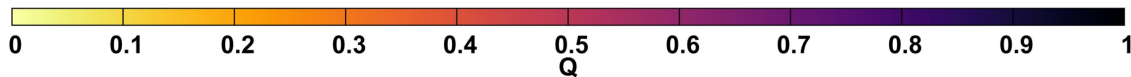

Supplement: supp [file elife-60434-supp-v1.zip]

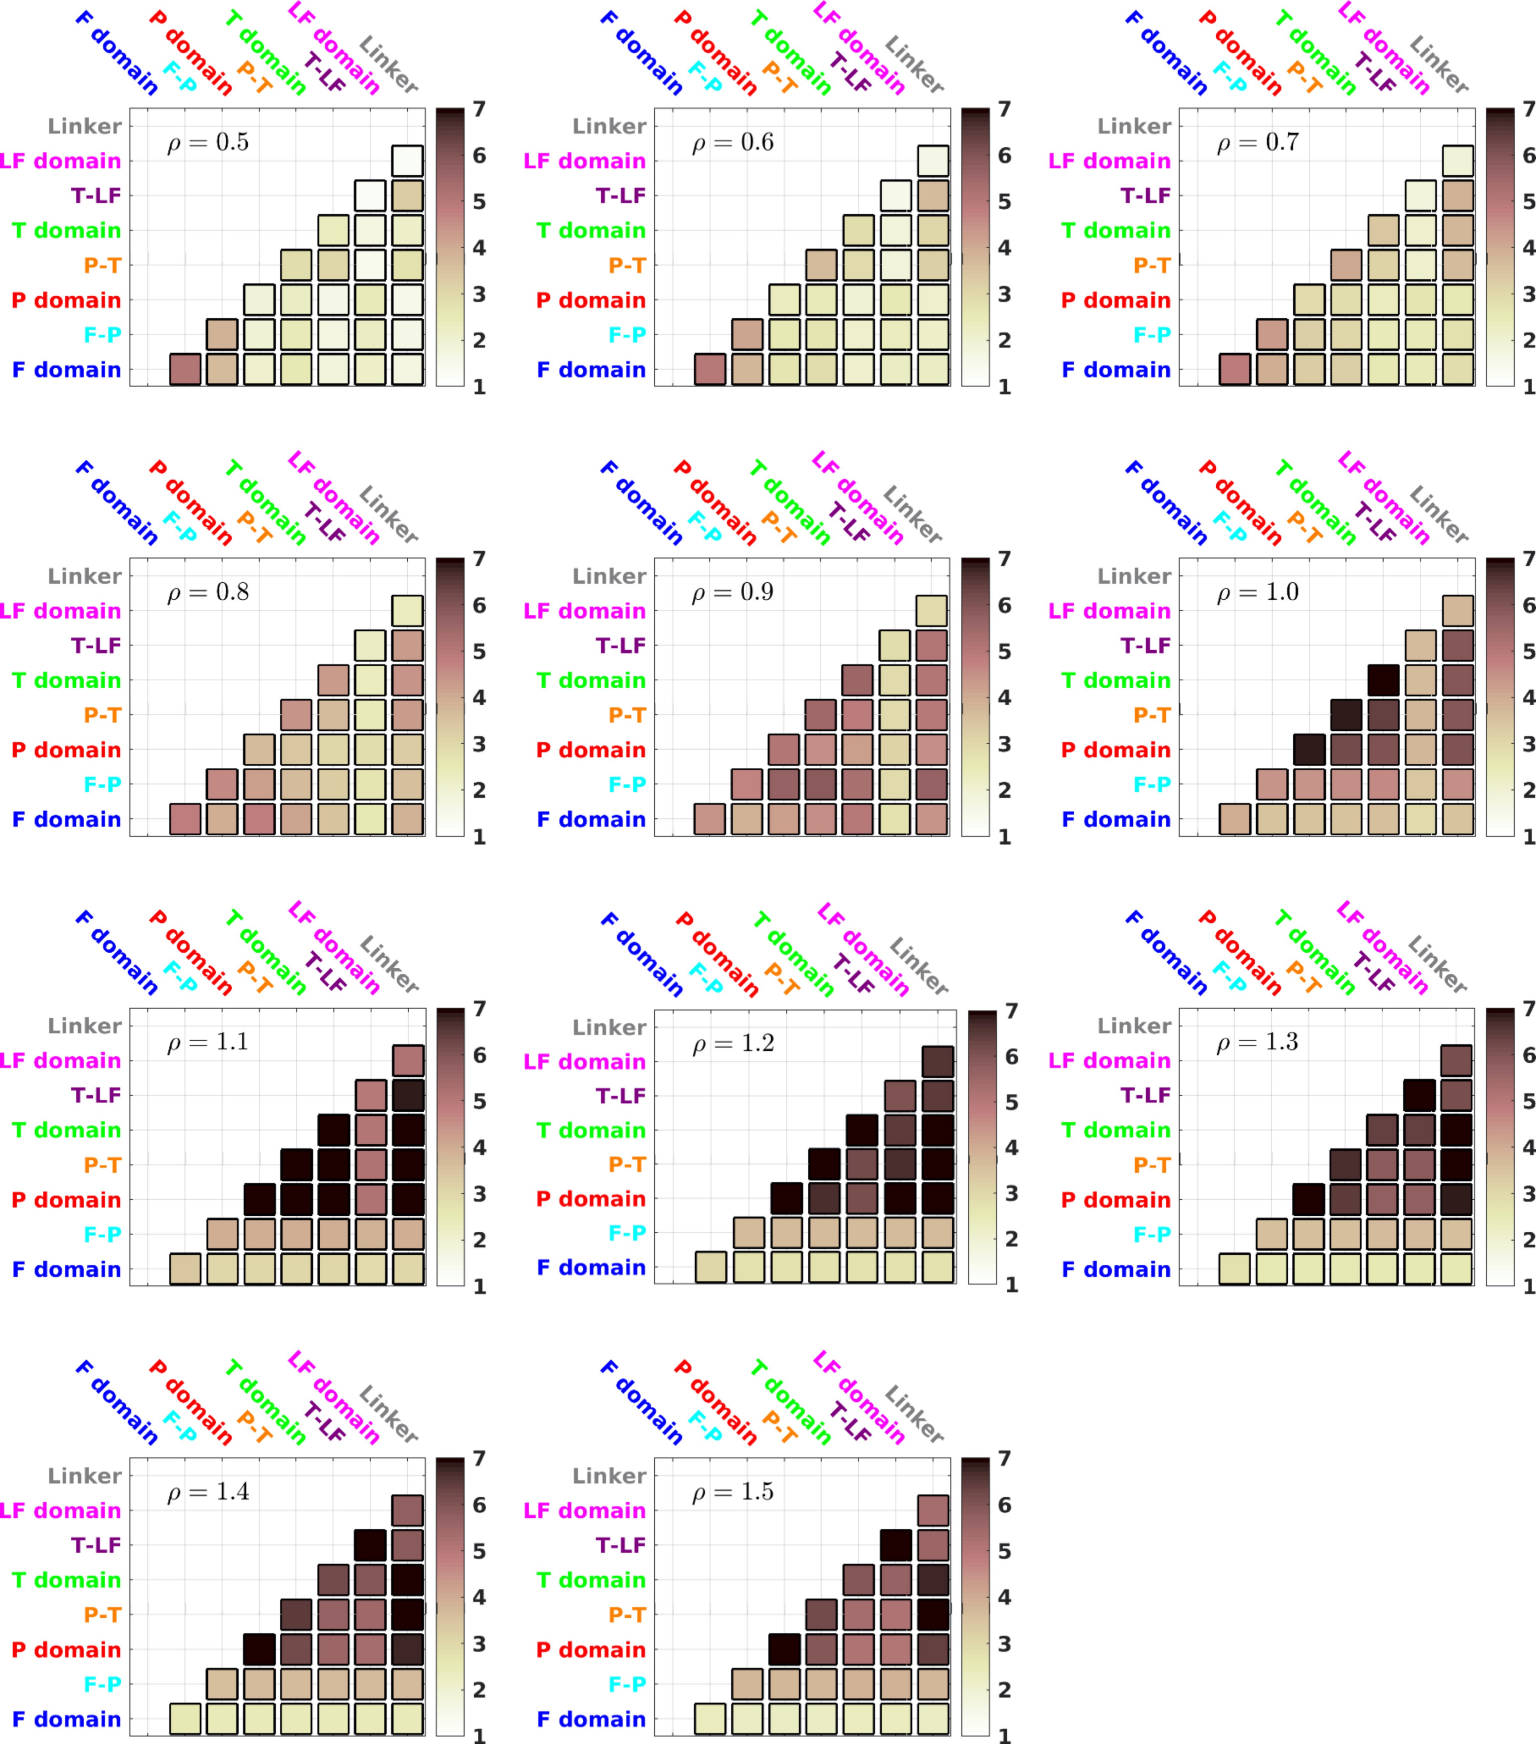

Supplement: supp [file elife-60434-supp-v1.zip]

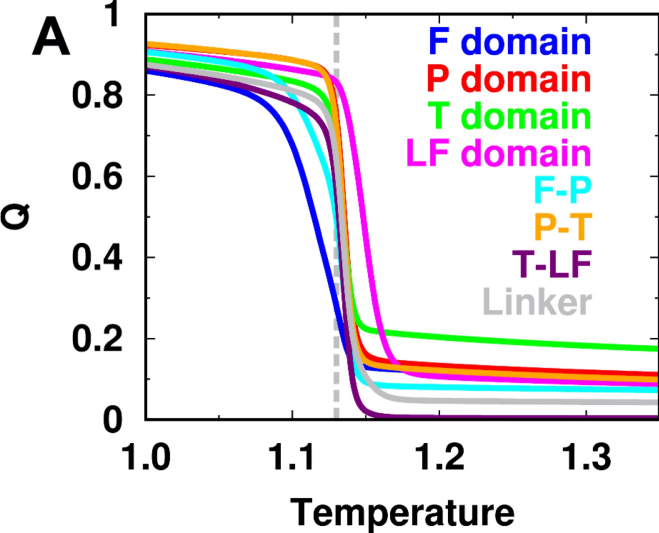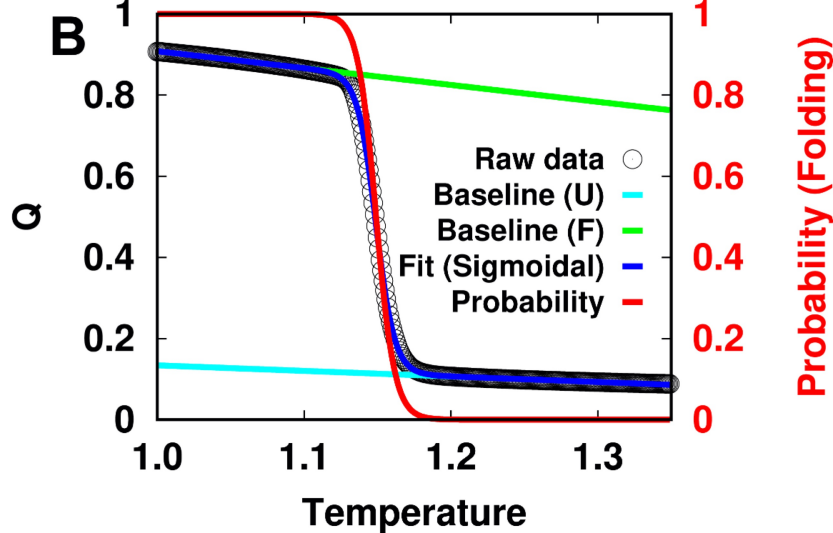

Supplement: supp [file elife-60434-supp-v1.zip]

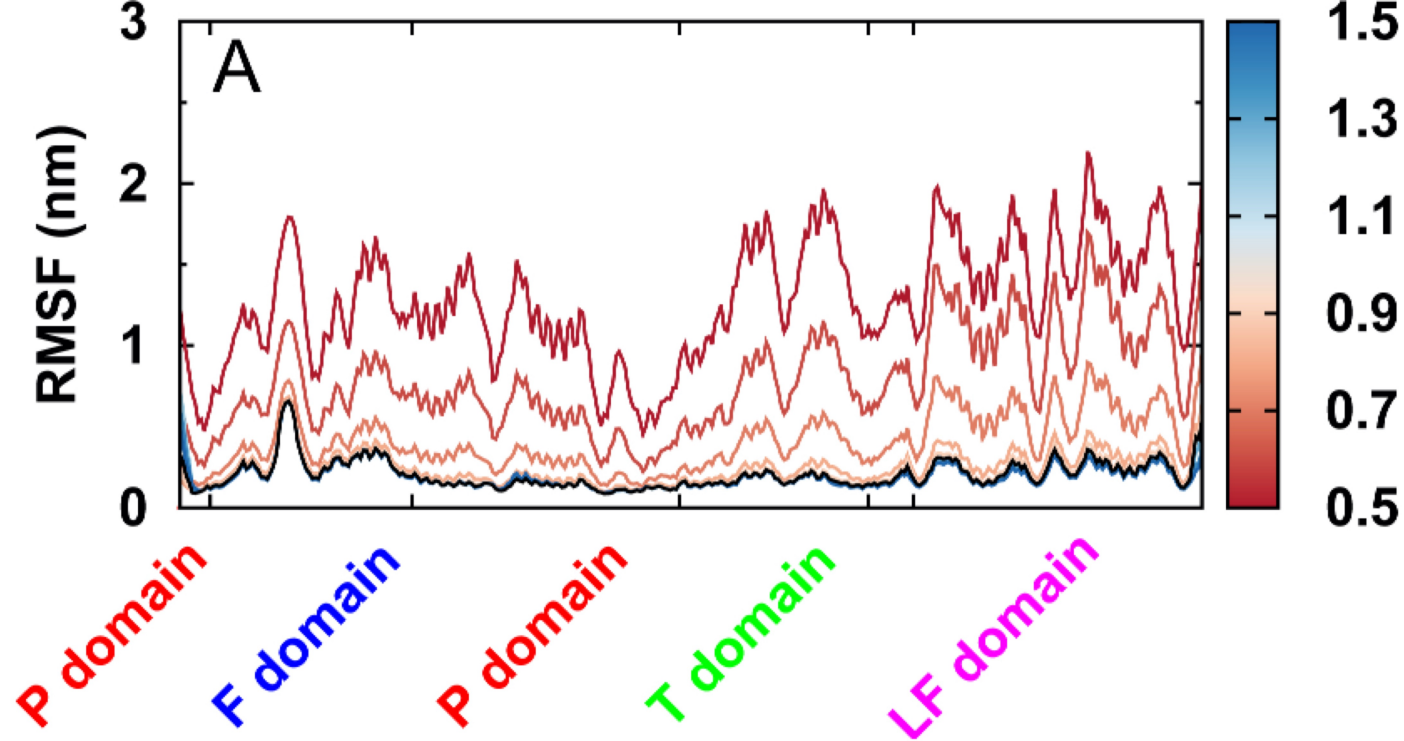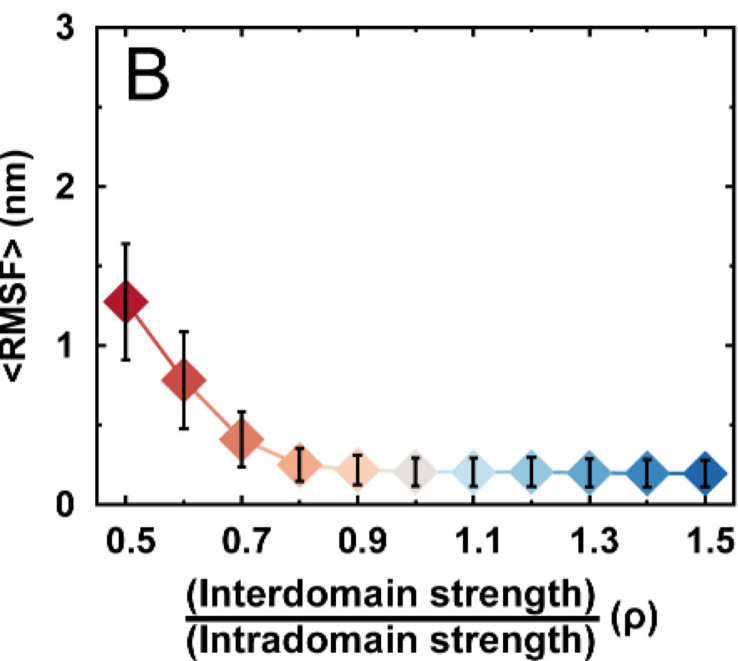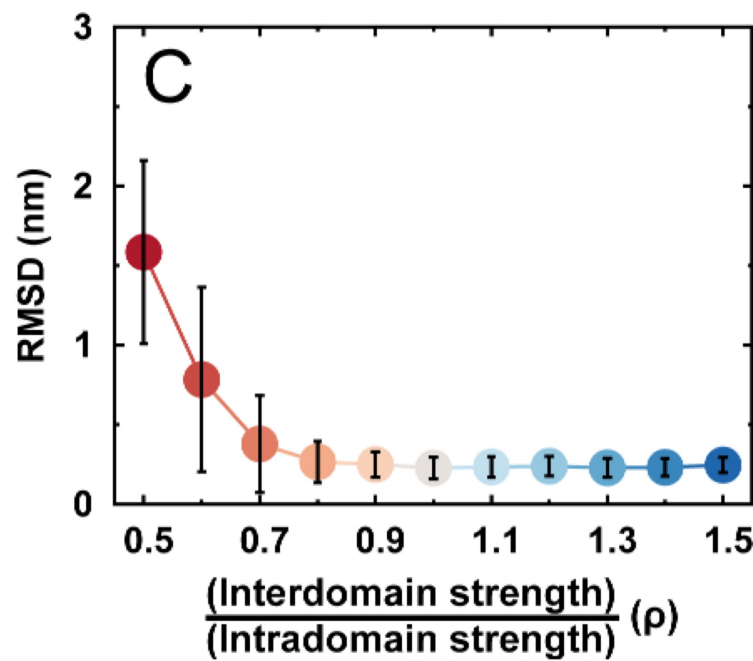

Supplement: supp [file elife-60434-supp-v1.zip]

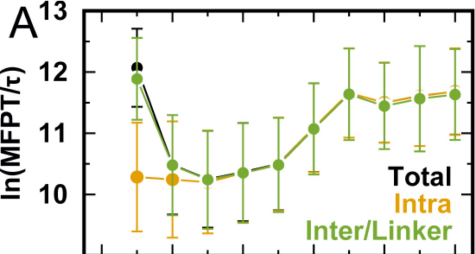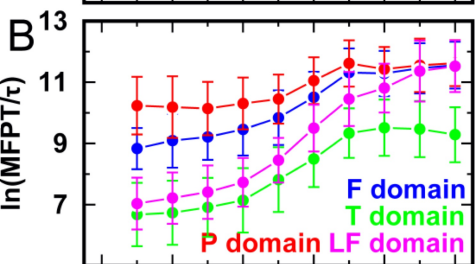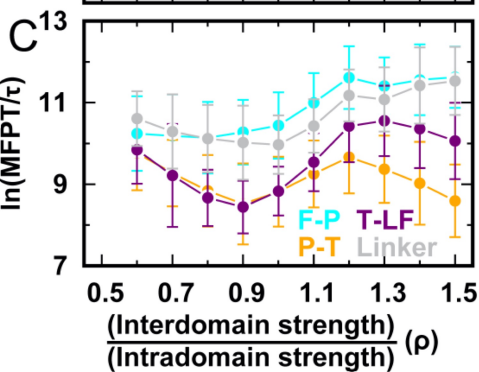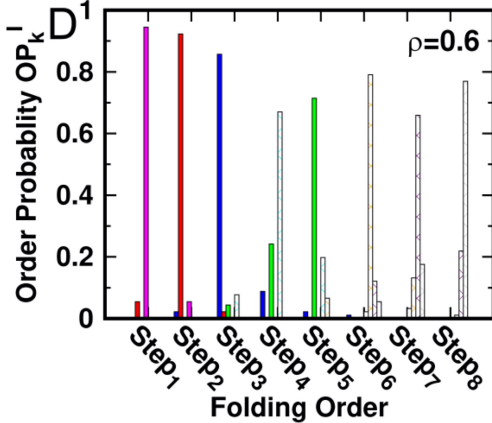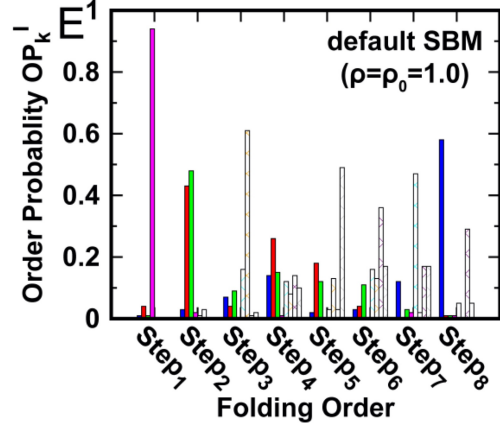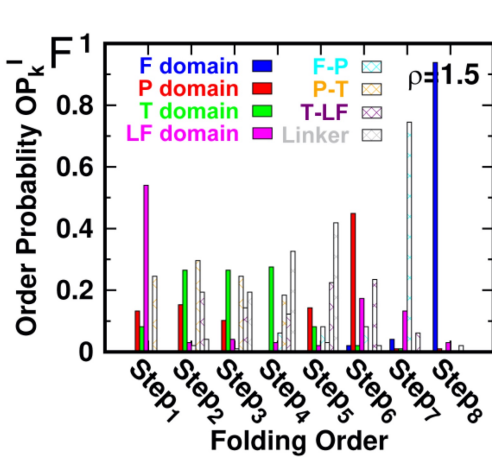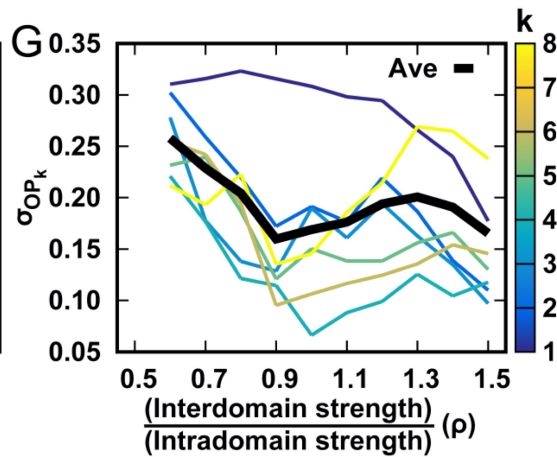

Supplement: supp [file elife-60434-supp-v1.zip]

**Backtracking I**

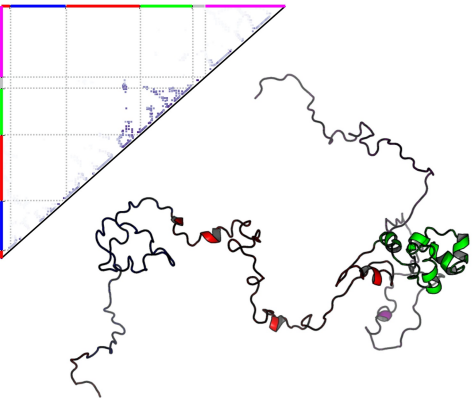

**Backtracking II-A**

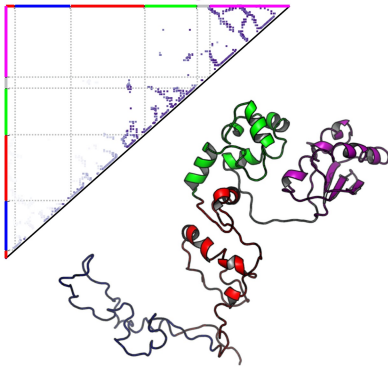

**Backtracking II-B**

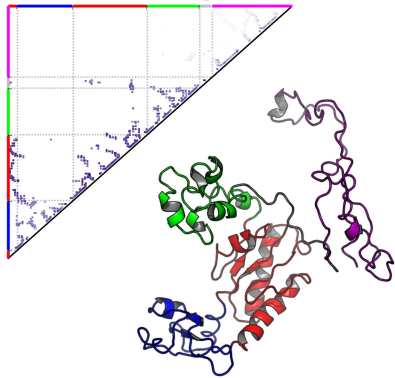

Supplement: supp [file elife-60434-supp-v1.zip]

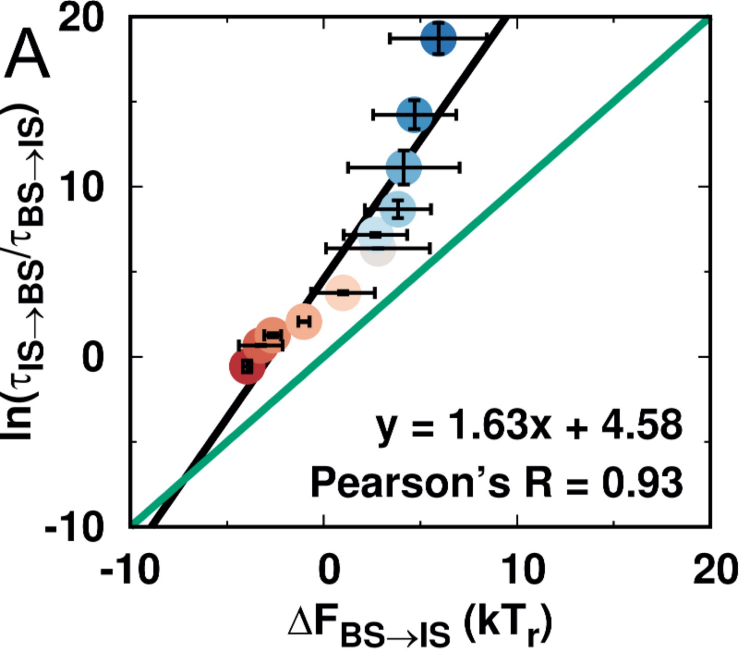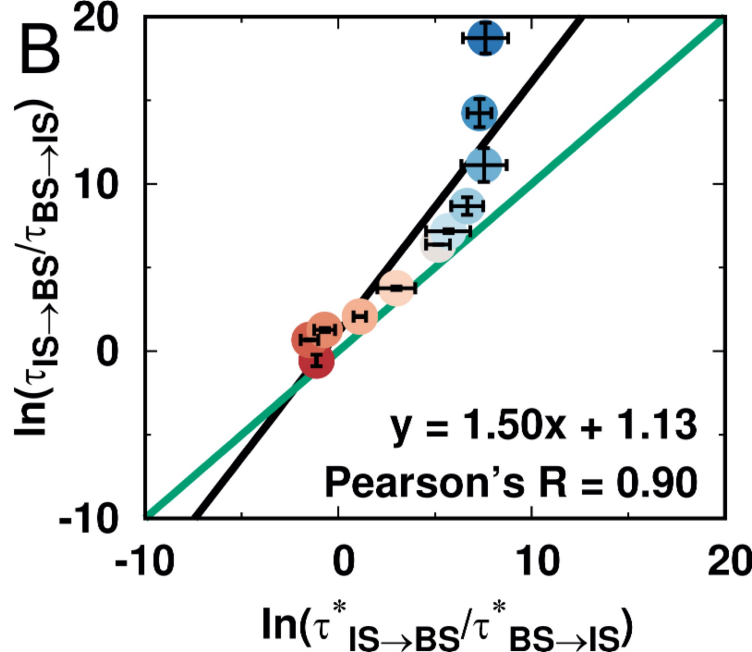

Supplement: supp [file elife-60434-supp-v1.zip]
